# Supplementary material
Source: publisher figshare collection journal article supplement (https://acs.figshare.com/ndownloader/files/7727164)
Supplement: Supplementary file 1 [file 7727164]

## Supporting Information

# Interfacial Design of Ternary Mixed Matrix Membranes Containing Pebax 1657/Silver-Nanopowder/[BMIM][BF<sub>4</sub>] for Improved CO<sub>2</sub> Separation Performance

Ehsan Ghasemi Estahbanati<sup>1</sup>, Mohammadreza Omidkhah<sup>\*,1</sup>, Abtin Ebadi Amooghin<sup>\*,2</sup>

<sup>1</sup> Faculty of Chemical Engineering, Tarbiat Modares University, P.O. Box 14115-143, Tehran, Iran

<sup>2</sup> Department of Chemical Engineering, Faculty of Engineering, Arak University, Arak 38156-8-8349, Iran

---

\* Corresponding author. Tel./Fax: +98 21 82883334. E-mail Address: Omidkhah@modares.ac.ir, Tel./Fax: +98 86 32625410. (A. Ebadi Amooghin), E-mail: a-ebadi@araku.ac.ir.

**Table S1.** Silver nanopowder properties (Aldrich).

| <b>properties</b> | <b>content</b> | <b>unit</b> |
|-------------------|----------------|-------------|
| Size              | <100           | nm          |
| Purity            | 99.5           | %           |
| Molar mass        | 107.87         | g/mol       |
| Relative density  | 10.49          | g/ml        |
| Appearance        | powder         | -           |
| Melting point     | 960            | °C          |

**Table S2.** Pebax 1657 properties (Arkema)<sup>1</sup>.

| <b>properties</b>                      | <b>content</b> | <b>unit</b>       |
|----------------------------------------|----------------|-------------------|
| Density(20°C)                          | 1.14           | g/cm <sup>3</sup> |
| Melting point(10°C/min)                | 204            | °C                |
| Flexural modulus                       | 80             | MPa               |
| Glass transition temperature(10°C/min) | -40            | °C                |
| Water absorption                       | 120            | %                 |
| Humidity absorption                    | 4.5            | %                 |

**Table S3.** ([BMIM][BF<sub>4</sub>]) properties (Aldrich)<sup>1</sup>.

| <b>properties</b> | <b>content</b> | <b>unit</b>       |
|-------------------|----------------|-------------------|
| Purity(GC)        | ≥ 97.0         | %                 |
| Density(20°C)     | 1.21           | g/cm <sup>3</sup> |
| Molar mass        | 226.02         | g/mol             |
| Water             | ≤ 1            | %                 |
| Melting point     | -71.0          | °C                |
| Flash point       | 288            | °C                |

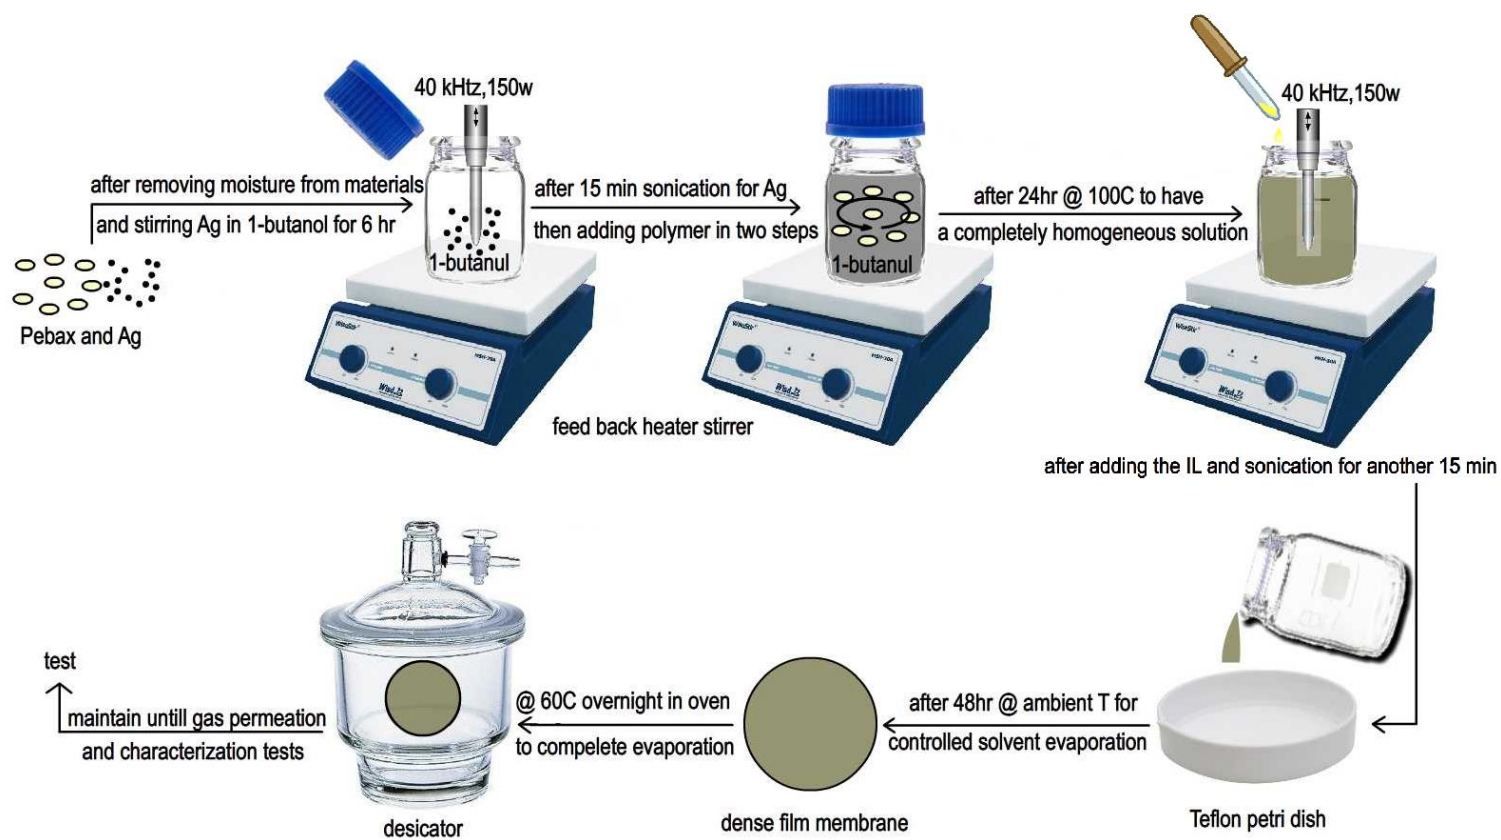

Figure S1. Schematic diagram of the membranes preparation procedure.

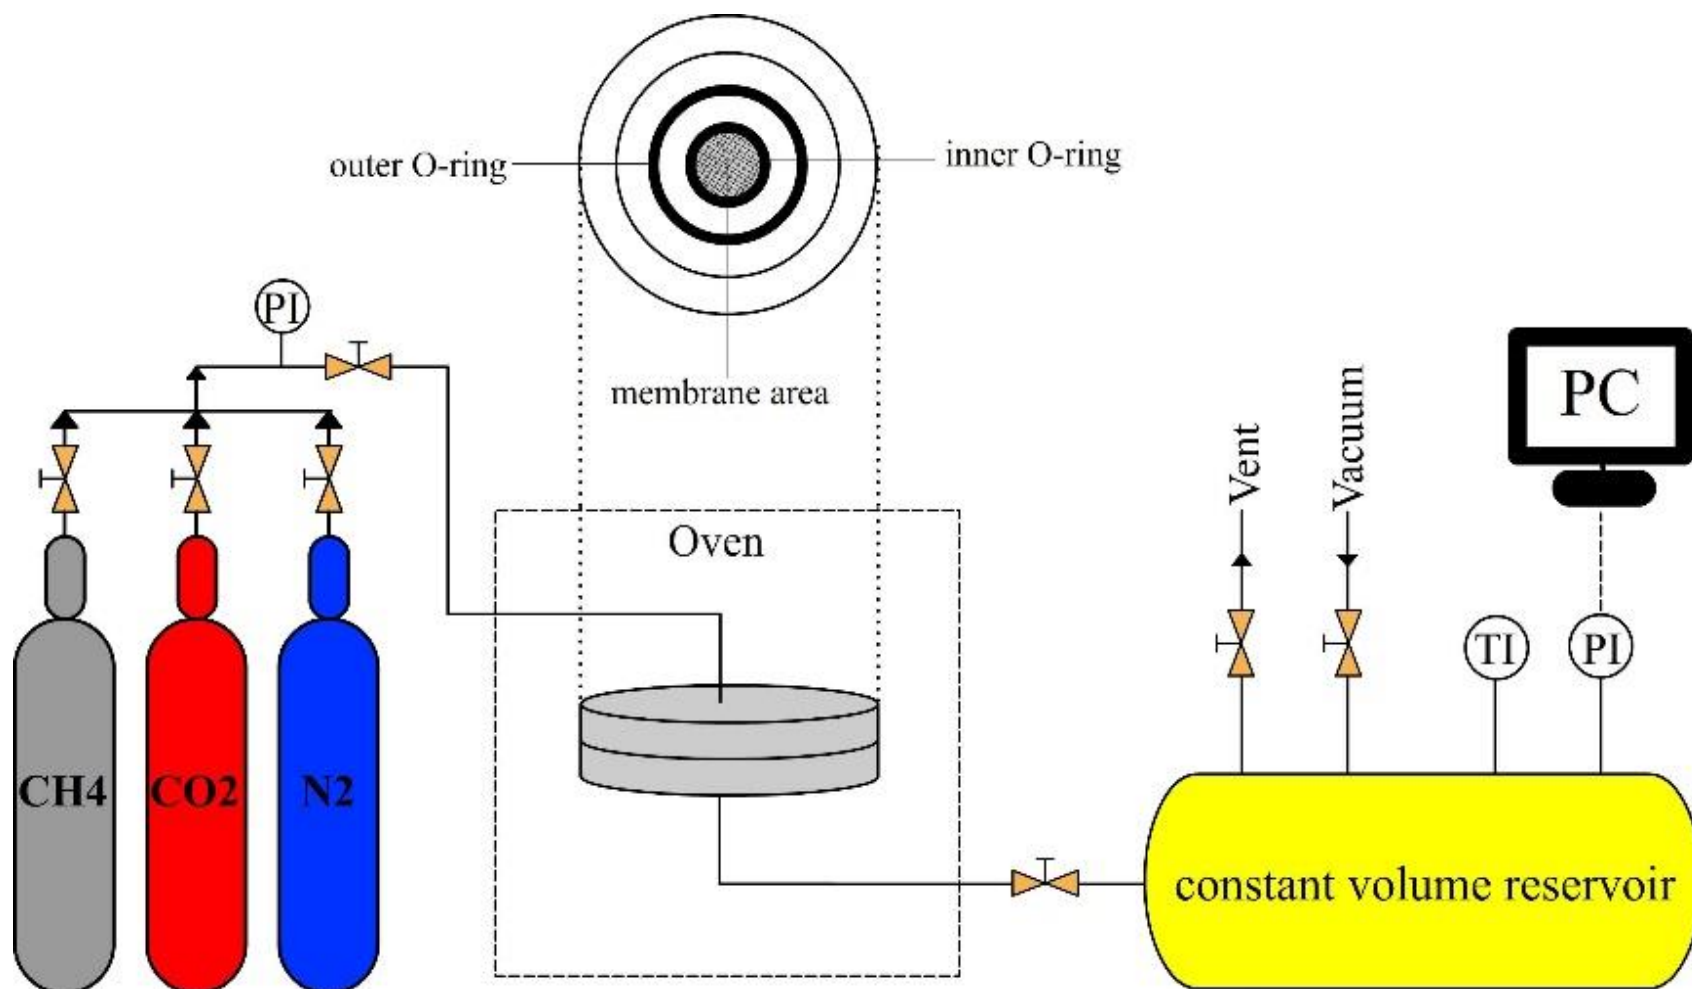

Figure S2. Schematic diagram of gas permeation set-up<sup>1</sup>.

In ternary MMMs, the presence of IL improves the interfacial adhesion and at the filler/polymer interface, fillers are entirely covered by the polymer layer and no micron size non-selective voids are identified and silver nanoparticles are completely sunken into the polymer matrix. This is affirmed by cross-section at higher magnifications ([Figures S3](#)). Indeed, the optimized mixing protocol and the illustrious affinity of positively polarized silver nanoparticles induced by employing the ionic liquid with polymer chains, are probably the main factors of the polymer/filler strong interaction.



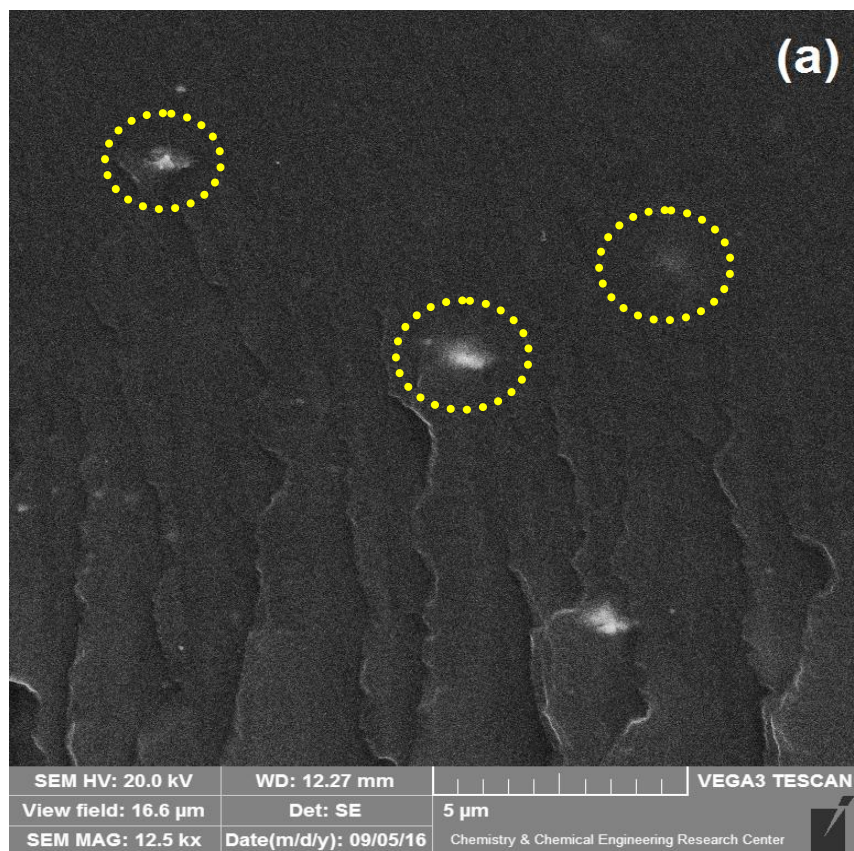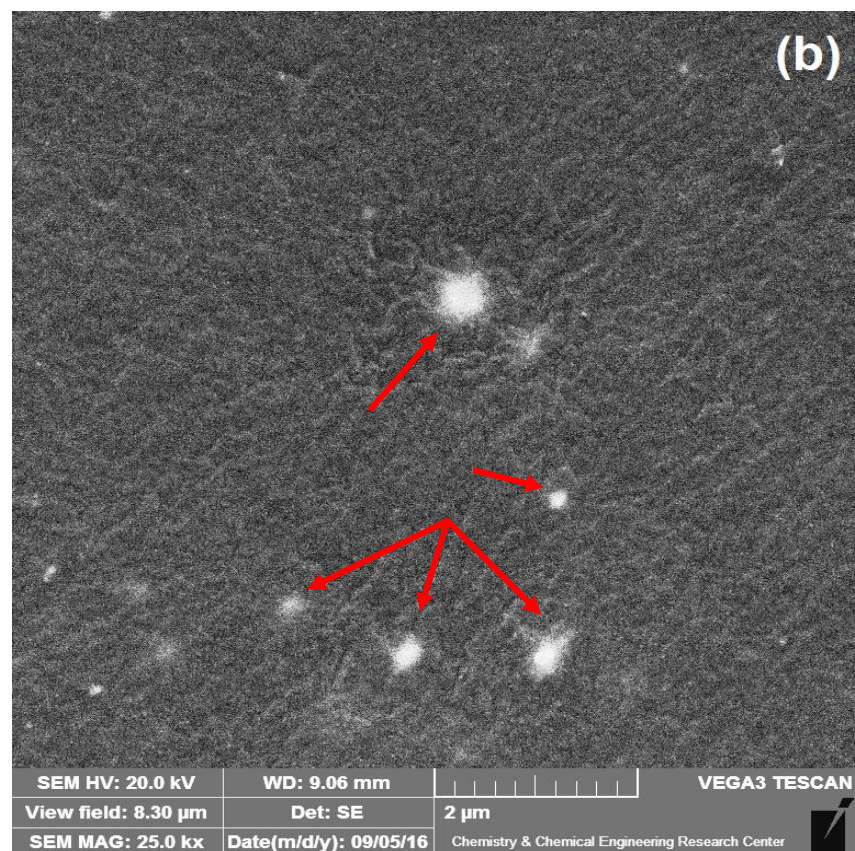

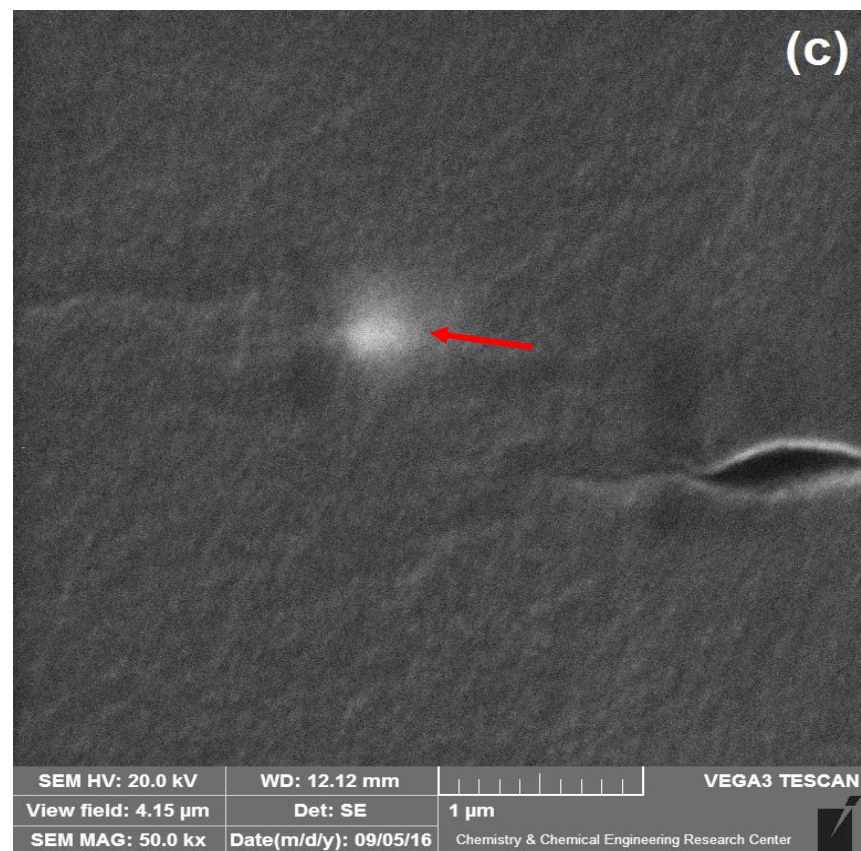

**Figure S3.** SEM images of (a) Pebax 1657/1.0%Ag cross-section at higher magnification (b) Pebax 1657/0.5%Ag/50%IL cross-section at higher magnification, (c) Pebax 1657/1.0%Ag/50%IL cross-section at higher magnification.

## References

- (1) Ghasemi Estahbanati, E.; Omidkhah, M.; Amooghin, A. E., Preparation and Characterization of Novel Ionic Liquid/Pebax Membranes for Efficient CO<sub>2</sub>/Light Gases Separation. *Journal of Industrial and Engineering Chemistry* **2017**, Accepted, <http://dx.doi.org/10.1016/j.jiec.2017.02.017>.
